# Supplementary material for: Interaction of Bdellovibrio bacteriovorus with Gram-Negative and Gram-Positive Bacteria in Dual Species and Polymicrobial Communities
Source: MDPI journal article supplement (doi:10.3390/microorganisms10040793), 2022-04-09
Supplement: s1 [file s1]

# Supplementary Information

Interaction of *Bdellovibrio bacteriovorus* with Gram-negative and Gram-positive bacteria in dual species and polymicrobial communities

**Table S1** The primers and cycling parameters utilised for the quantification of *B. bacteriovorus* PF13, *P. fluorescens*, *K. pneumoniae*, *S. aureus* and *E. faecium* with the EMA-qPCR assays

| Organisms                  | Primer    | Primer Sequences<br>(5' – 3') | qPCR Cycling Parameters                                                                                                                                      | Conventional PCR<br>Cycling Parameters                                                                       | Gene<br>(product<br>size in bp) | Melting<br>Peak (°C) | Reference                |
|----------------------------|-----------|-------------------------------|--------------------------------------------------------------------------------------------------------------------------------------------------------------|--------------------------------------------------------------------------------------------------------------|---------------------------------|----------------------|--------------------------|
| <i>Bdellovibrio</i> spp.   | Bd347F    | GGAGGCAGCAG<br>TAGGGAATA      | 2 min at 95°C; 50 cycles of 15 s at 95°C and 60 s at 60°C; high resolution melting of 60 s at 95°C, 60 s at 40°C, 1 s at 65°C and 1 s at 97°C                | 2 min at 95°C; 50 cycles of 15 s at 95°C and 60 s at 60°C; final elongation of 10 min at 72°C                | 16S rRNA<br>(202)               | 84.30±<br>1.00       | Van Essche et al., 2009  |
|                            | Bd549R    | GCTAGGATCCCT<br>CGTCTTACC     |                                                                                                                                                              |                                                                                                              |                                 |                      |                          |
| <i>Enterococcus</i> spp.   | ECST784F  | AGAAATTCCAAA<br>CGAACTTG      | 10 min at 95°C; 50 cycles of 15 s at 95°C and 60 s at 60°C; high resolution melting of 60 s at 95°C, 60 s at 40°C, 1 s at 65°C and 1 s at 97°C               | 5 min at 95°C; 30 cycles of 30 s at 94°C, 60 s at 59°C and 60 s at 72°C; final elongation of 10 min at 72°C  | 23S rRNA<br>(75)                | 79.15 ±<br>1.00      | Frahm and Obst, 2003     |
|                            | ENC854R   | CAGTGCTCTACC<br>TCCATCATT     |                                                                                                                                                              |                                                                                                              |                                 |                      |                          |
| <i>Klebsiella</i> spp.     | gyrA-A    | CGCGTACTATAC<br>GCCATGAACGTA  | 10 min at 95°C; 50 cycles of 60 s at 94°C, 30 s at 50°C and 30 s at 72°C; high resolution melting of 60 s at 95°C, 60 s at 40°C, 1 s at 65°C and 1 s at 97°C | 3 min at 95°C; 35 cycles of 60 s at 94°C, 30 s at 50°C and 30 s at 72°C; final elongation of 10 min at 72°C  | <i>Gyrase A</i><br>(383)        | 87.70 ±<br>1.00      | Brisse and Verhoef, 2001 |
|                            | gyrA-C    | ACCGTTGATCAC<br>TTCGGTCAGG    |                                                                                                                                                              |                                                                                                              |                                 |                      |                          |
| <i>Pseudomonas</i> spp.    | PS1       | ATGAACAACGTT<br>CTGAAATTC     | 10 min at 95°C; 50 cycles of 30 s at 94°C, 30 s at 58°C and 30 s at 72°C; high resolution melting of 60 s at 95°C, 60 s at 40°C, 1 s at 65°C and 1 s at 97°C | 10 min at 95°C; 50 cycles of 30 s at 94°C, 30 s at 58°C and 30 s at 72°C; final elongation of 10 min at 72°C | <i>oprI</i> (249)               | 88.70 ±<br>1.00      | Bergmark et al., 2012    |
|                            | PS2       | CTGCGGCTGGCT<br>TTTTCCAG      |                                                                                                                                                              |                                                                                                              |                                 |                      |                          |
| <i>Staphylococcus</i> spp. | PanStaphF | CAATGCCACAAA<br>CTCG          | 10 min at 95°C; 45 cycles of 30 s at 95°C, 30 s at 61°C and 30 s at                                                                                          | 10 min at 95°C; 45 cycles of 30 s at 95°C,                                                                   | <i>tuf</i> (462)                | 81.50 ±<br>1.00      | Sakai et al., 2004       |

---

|           |                      |                                                                                                |                                                                            |
|-----------|----------------------|------------------------------------------------------------------------------------------------|----------------------------------------------------------------------------|
| PanStaphR | GCTTCAGCGTAG<br>TCTA | 72°C; high resolution melting of<br>60 s at 95°C, 60 s at 40°C, 1 s at<br>65°C and 1 s at 97°C | 30 s at 61°C and 30 s<br>at 72°C; final<br>elongation of 10 min<br>at 72°C |
|-----------|----------------------|------------------------------------------------------------------------------------------------|----------------------------------------------------------------------------|

---

**Table S2** Performance characteristics for the qPCR assays to quantify the Gram-negative bacteria, Gram-positive bacteria and the predator *B. bacteriovorus* PF13

| qPCR Performance Characteristics                  | <i>B. bacteriovorus</i> | <i>P. fluorescens</i> | <i>K. pneumoniae</i> | <i>S. aureus</i> | <i>E. faecium</i> |
|---------------------------------------------------|-------------------------|-----------------------|----------------------|------------------|-------------------|
| Efficiency ( <i>E</i> )                           | 105 ± 1.25              | 90 ± 1.00             | 95.25 ± 0.75         | 96.13 ± 2.33     | 101% ± 1.00       |
| y-intercept                                       | 32.99 ± 2.98            | 39.72 ± 0.34          | 33.89 ± 0.285        | 35.54 ± 1.95     | 33.15 ± 0.34      |
| Correlation Coefficient ( <i>r</i> <sup>2</sup> ) | 0.96 ± 0.07             | 1.00 ± 0.00           | 1.00 ± 0.00          | 0.99 ± 0.00      | 1.00 ± 0.00       |
| Slope                                             | -2.49 ± 0.46            | -3.95 ± 0.057         | -3.58 ± 0.04         | -3.53 ± 0.14     | -3.29 ± 0.045     |

**Table S3** Concentration of the Gram-negative and Gram-positive bacteria in the control assays

| Experimental Group       | Combinations                                                                        | Culture-based Analysis      |                           |            | EMA-qPCR Analysis           |                           |            |
|--------------------------|-------------------------------------------------------------------------------------|-----------------------------|---------------------------|------------|-----------------------------|---------------------------|------------|
|                          |                                                                                     | Initial cell count (CFU/mL) | Final cell count (CFU/mL) | Log change | Initial gene copies (GC/mL) | Final gene copies (GC/mL) | Log change |
| A: <i>P. fluorescens</i> |                                                                                     |                             |                           |            |                             |                           |            |
| Co-culture Experiment    | <i>P. fluorescens</i> only                                                          | $2.75 \times 10^9$          | $1.78 \times 10^9$        | -0.19      | $5.26 \times 10^5$          | $1.08 \times 10^6$        | +0.31      |
| Dual species Experiments | <i>P. fluorescens</i> + <i>S. aureus</i>                                            | $3.07 \times 10^9$          | $3.33 \times 10^9$        | +0.04      | $1.95 \times 10^6$          | $2.37 \times 10^6$        | +0.08      |
|                          | <i>P. fluorescens</i> + <i>E. faecium</i>                                           | $8.27 \times 10^9$          | $7.33 \times 10^8$        | -1.05      | $2.81 \times 10^6$          | $1.20 \times 10^5$        | -1.37      |
|                          | <i>P. fluorescens</i> + <i>K. pneumoniae</i>                                        | $7.40 \times 10^8$          | $2.56 \times 10^9$        | +0.54      | $3.01 \times 10^4$          | $2.41 \times 10^5$        | +0.90      |
| Polymicrobial Experiment | <i>P. fluorescens</i> + <i>K. pneumoniae</i> + <i>S. aureus</i> + <i>E. faecium</i> | ND                          | ND                        | ND         | $5.94 \times 10^5$          | $5.58 \times 10^6$        | +0.97      |
| B: <i>K. pneumoniae</i>  |                                                                                     |                             |                           |            |                             |                           |            |
| Co-culture Experiment    | <i>K. pneumoniae</i> only                                                           | $5.34 \times 10^8$          | $1.23 \times 10^9$        | +0.36      | $1.29 \times 10^7$          | $5.09 \times 10^7$        | +0.60      |
| Dual species Experiments | <i>K. pneumoniae</i> + <i>S. aureus</i>                                             | $1.67 \times 10^8$          | $1.07 \times 10^7$        | -1.19      | $6.83 \times 10^6$          | $5.75 \times 10^7$        | +0.93      |
|                          | <i>K. pneumoniae</i> + <i>E. faecium</i>                                            | $3.00 \times 10^8$          | $6.33 \times 10^8$        | +0.32      | $1.05 \times 10^7$          | $2.58 \times 10^6$        | -0.61      |
|                          | <i>K. pneumoniae</i> + <i>P. fluorescens</i>                                        | $4.93 \times 10^8$          | $1.32 \times 10^9$        | +0.43      | $4.22 \times 10^6$          | $5.95 \times 10^7$        | +1.15      |
| Polymicrobial Experiment | <i>K. pneumoniae</i> + <i>P. fluorescens</i> + <i>S. aureus</i> + <i>E. faecium</i> | ND                          | ND                        | ND         | $7.67 \times 10^5$          | $1.03 \times 10^7$        | +1.13      |

| Experimental Group       | Combinations                                                                        | Culture-based Analysis      |                           |            | EMA-qPCR Analysis           |                           |            |
|--------------------------|-------------------------------------------------------------------------------------|-----------------------------|---------------------------|------------|-----------------------------|---------------------------|------------|
|                          |                                                                                     | Initial cell count (CFU/mL) | Final cell count (CFU/mL) | Log change | Initial gene copies (GC/mL) | Final gene copies (GC/mL) | Log change |
| C: <i>S. aureus</i>      |                                                                                     |                             |                           |            |                             |                           |            |
| Co-culture Experiment    | <i>S. aureus</i> only                                                               | $3.10 \times 10^8$          | $1.37 \times 10^8$        | -0.36      | $5.91 \times 10^6$          | $1.17 \times 10^6$        | -0.70      |
| Dual species Experiments | <i>S. aureus</i> + <i>P. fluorescens</i>                                            | $4.63 \times 10^9$          | $7.63 \times 10^7$        | -1.78      | $6.26 \times 10^6$          | $1.07 \times 10^5$        | -1.77      |
|                          | <i>S. aureus</i> + <i>K. pneumoniae</i>                                             | $1.67 \times 10^8$          | $1.07 \times 10^7$        | -1.19      | $1.77 \times 10^5$          | $2.90 \times 10^5$        | +0.21      |
| Polymicrobial Experiment | <i>S. aureus</i> + <i>P. fluorescens</i> + <i>K. pneumoniae</i> + <i>E. faecium</i> | ND                          | ND                        | ND         | $4.36 \times 10^6$          | $2.30 \times 10^6$        | -0.28      |
| D: <i>E. faecium</i>     |                                                                                     |                             |                           |            |                             |                           |            |
| Co-culture Experiment    | <i>E. faecium</i> only                                                              | $1.80 \times 10^9$          | $2.10 \times 10^8$        | -0.93      | $2.94 \times 10^7$          | $1.73 \times 10^7$        | -0.23      |
| Dual species Experiments | <i>E. faecium</i> + <i>P. fluorescens</i>                                           | $2.47 \times 10^9$          | $1.23 \times 10^7$        | -2.30      | $1.89 \times 10^7$          | $4.84 \times 10^6$        | -0.59      |
|                          | <i>E. faecium</i> + <i>K. pneumoniae</i>                                            | $1.67 \times 10^8$          | $2.23 \times 10^7$        | -0.87      | $1.44 \times 10^7$          | $3.29 \times 10^6$        | -0.64      |
| Polymicrobial Experiment | <i>E. faecium</i> + <i>P. fluorescens</i> + <i>K. pneumoniae</i> + <i>S. aureus</i> | ND                          | ND                        | ND         | $1.04 \times 10^7$          | $1.28 \times 10^7$        | +0.09      |

ND – Not Determined
